# Supplementary material
Source: PubMed Central journal article supplement (PMC3622813)
Supplement: NIHMS438611-supplement-SI.pdf [file NIHMS438611-supplement-SI.pdf]

**(E)-4-Aryl-4-oxo-2-butenic Acid Amides, the Chalcone-Aroylacrylic Acid  
Chimeras. Design, Antiproliferative Activity and Inhibition of Tubulin  
Polymerization**

Maja D. Vitorovic-Todorović,\* Aleksandra Erić, Branka Kolundžija, Ernest Hamel, Slavica Ristić, Ivan O. Juranić, Branko J. Drakulić

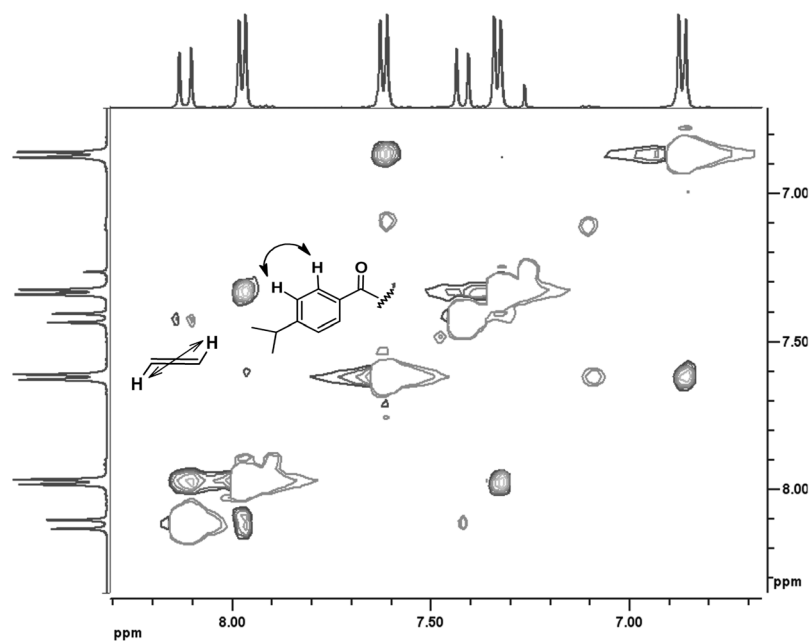

**Figure S1.** NOESY signals between  $-\text{CH}=\text{CH}-$  protons, and between *ortho*- and *meta*- protons on aryl ring of derivative **11**.

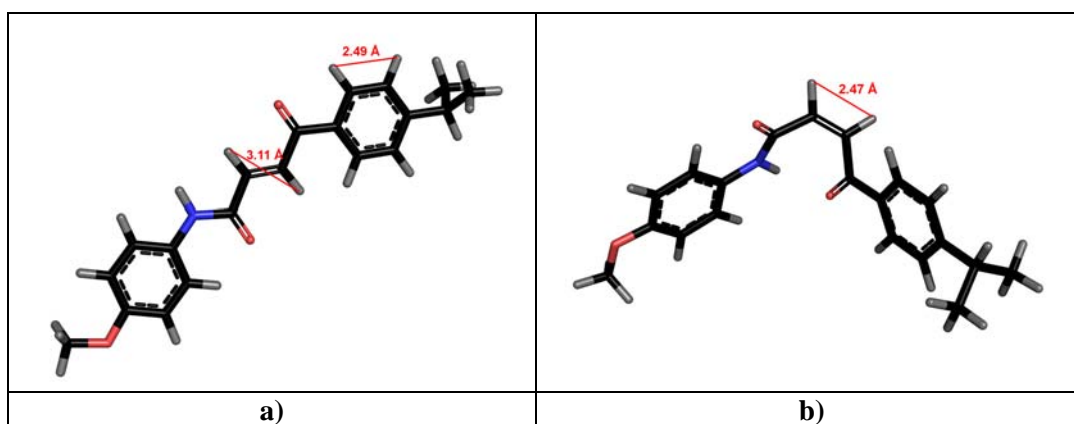

**Figure S2.** Optimized geometries of derivative **11** in it's a) (*E*-), and b) (*Z*-) form.

\* Correspond to: [mvitod@chem.bg.ac.rs](mailto:mvitod@chem.bg.ac.rs)

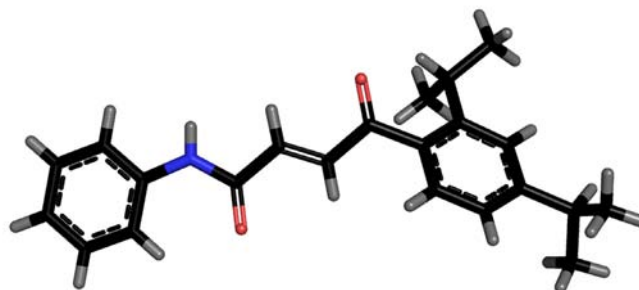

Figure S3. Geometry of derivative 12, as obtained by single-crystal x-ray analysis.

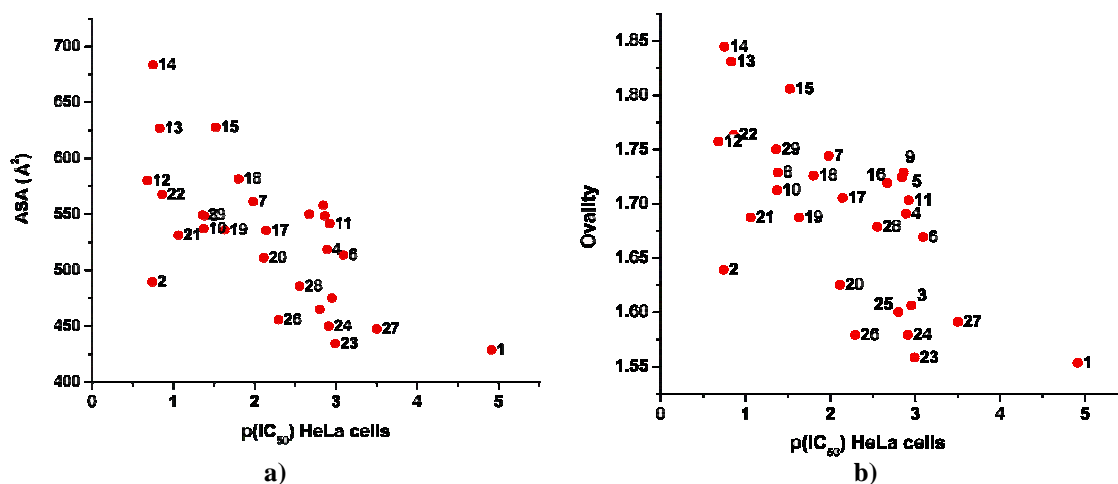

Figure S4. Trend between  $p(\text{IC}_{50})$  toward HeLa cells and a) apolar surface area, and b) ovality of compounds 1-29.

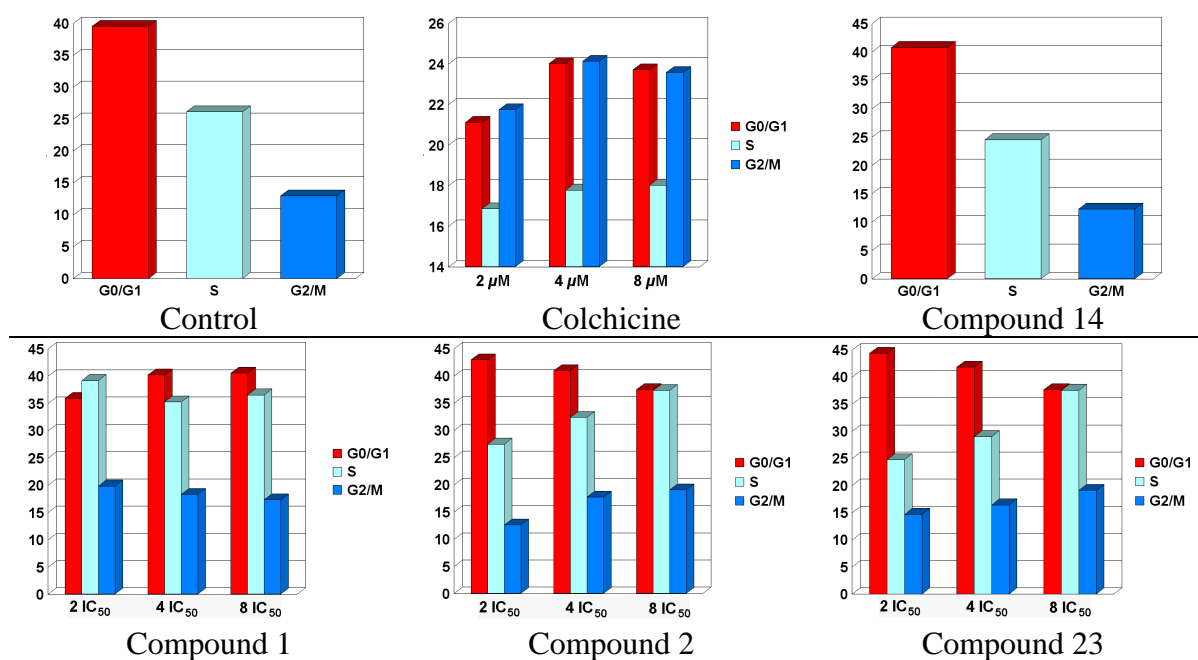

Figure S5. Cell cycle analysis of compounds 1, 2, 14 and 23, Table 3 in the main text.

**Table S6.** Some 3D-dependant properties of **1-29**, for conformations obtained as energy minima by OMEGA and MMFF94s.

|             | 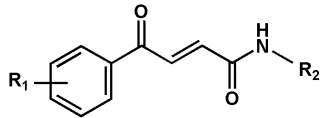 |                     | Solvent<br>Accessible<br>Area | Apolar<br>Surface<br>Area | Volume | Ovality | VlogP  |
|-------------|-----------------------------------------------------------------------------------|---------------------|-------------------------------|---------------------------|--------|---------|--------|
|             | R <sub>1</sub> -                                                                  | R <sub>2</sub> -    |                               |                           |        |         |        |
| <b>1</b> *  | H                                                                                 | Ph-                 | 509.9                         | 428.9                     | 235.5  | 1.5535  | 2.1945 |
| <b>2</b> *  | 2,5-di-Me                                                                         | Ph-                 | 569.9                         | 489.7                     | 263.0  | 1.6393  | 3.0778 |
| <b>3</b> *  | 3,4-di-Me                                                                         | Ph-                 | 554.8                         | 475.2                     | 267.1  | 1.6063  | 2.9708 |
| <b>4</b>    | 3,4-di-Me                                                                         | 3,5-di-OMe-Ph-      | 633.3                         | 518.6                     | 316.4  | 1.6909  | 3.1674 |
| <b>5</b>    | 3,4-di-Me                                                                         | 4- <i>i</i> -Pr-Ph- | 637.9                         | 558.2                     | 315.2  | 1.7245  | 4.0284 |
| <b>6</b> *  | 4- <i>i</i> -Pr                                                                   | Ph-                 | 591.7                         | 513.6                     | 288.1  | 1.6694  | 3.2755 |
| <b>7</b>    | 4- <i>i</i> -Pr                                                                   | 3,5-di-OMe-Ph-      | 676.1                         | 561.4                     | 332.6  | 1.7442  | 3.5008 |
| <b>8</b>    | 4- <i>i</i> -Pr                                                                   | Ch-                 | 621.6                         | 548.6                     | 303.5  | 1.7289  | 3.4775 |
| <b>9</b> *  | 2,5-di-Me                                                                         | Bn-                 | 621.6                         | 548.6                     | 303.5  | 1.7289  | 3.4775 |
| <b>10</b> # | 4- <i>i</i> -Pr                                                                   | Bn-                 | 623.6                         | 537.2                     | 301.6  | 1.7127  | 2.9966 |
| <b>11</b>   | 4- <i>i</i> -Pr                                                                   | 4-OMe-Ph-           | 640.6                         | 541.8                     | 309.4  | 1.7034  | 3.4143 |
| <b>12</b>   | 2,4-di- <i>i</i> -Pr                                                              | Ph-                 | 653.4                         | 580.2                     | 333.1  | 1.7575  | 4.2303 |
| <b>13</b>   | 2,4-di- <i>i</i> -Pr                                                              | 3,5-di-OMe-Ph-      | 733.3                         | 626.9                     | 385.3  | 1.8311  | 4.5257 |
| <b>14</b>   | 2,4-di- <i>i</i> -Pr                                                              | 4- <i>i</i> -Pr     | 754.1                         | 683.7                     | 383.7  | 1.8449  | 5.3879 |
| <b>15</b>   | 2,4-di- <i>i</i> -Pr                                                              | Bn-                 | 702.7                         | 627.8                     | 346.4  | 1.8059  | 4.1541 |
| <b>16</b>   | $\beta$ -tetralinoyl                                                              | 3,5-di-OMe-Ph-      | 660.9                         | 550.1                     | 339.6  | 1.7192  | 3.7478 |
| <b>17</b> * | $\beta$ -tetralinoyl                                                              | Ch-                 | 603.5                         | 535.7                     | 305.0  | 1.7055  | 3.7381 |
| <b>18</b>   | $\beta$ -tetralinoyl                                                              | 4- <i>i</i> -Pr-Ph- | 658.8                         | 581.7                     | 341.6  | 1.7261  | 4.4992 |
| <b>19</b> # | $\beta$ -tetralinoyl                                                              | Bn-                 | 618.6                         | 536.2                     | 307.8  | 1.6875  | 3.4062 |
| <b>20</b> * | $\beta$ -tetralinoyl                                                              | Ph-                 | 595.2                         | 511.2                     | 287.9  | 1.6254  | 3.4416 |
| <b>21</b> * | 4- <i>n</i> -Bu                                                                   | Ph-                 | 609.3                         | 531.4                     | 301.3  | 1.6875  | 3.1340 |
| <b>22</b>   | 2,3,5,6-tetra-Me                                                                  | 3,5-di-OMe-Ph-      | 678.6                         | 567.8                     | 348.6  | 1.7637  | 4.0446 |
| <b>23</b> * | 4-F                                                                               | Ph-                 | 514.2                         | 434.5                     | 239.0  | 1.5584  | 2.4130 |
| <b>24</b> * | 4-Cl                                                                              | Ph-                 | 529.7                         | 450.1                     | 247.0  | 1.5793  | 2.8163 |
| <b>25</b> * | 3,4-di-Cl                                                                         | Ph-                 | 544.8                         | 465.2                     | 260.2  | 1.6003  | 3.3713 |
| <b>26</b> * | 4-Br                                                                              | Ph-                 | 535.5                         | 455.9                     | 252.1  | 1.5792  | 3.0228 |
| <b>27</b> * | 4-OMe                                                                             | Ph-                 | 547.1                         | 447.6                     | 259.1  | 1.5912  | 2.3008 |
| <b>28</b>   | 4-OMe                                                                             | 3,5-di-OMe-Ph-      | 620.3                         | 485.8                     | 308.1  | 1.6789  | 2.4709 |
| <b>29</b>   | 3,5-di-Me-4-OMe                                                                   | 3,5-di-OMe-Ph-      | 675.7                         | 549.4                     | 335.2  | 1.7503  | 3.3902 |

\*Inhibited tubulin assembly with IC<sub>50</sub> values < 20  $\mu$ M; # **19** has a SAS, and **10** has a volume somewhat below cut-offs, as described in the text, and did not inhibit tubulin assembly with IC<sub>50</sub> values < 20  $\mu$ M.

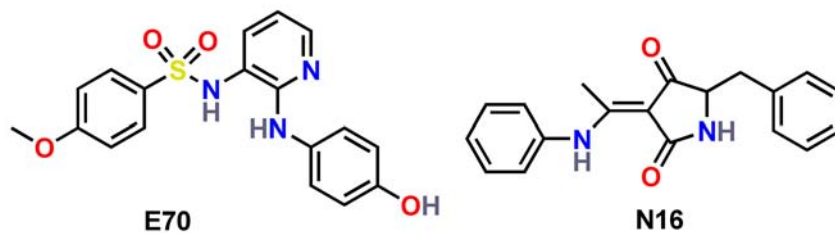**Scheme S7.** 2D structures of E70 and N16.

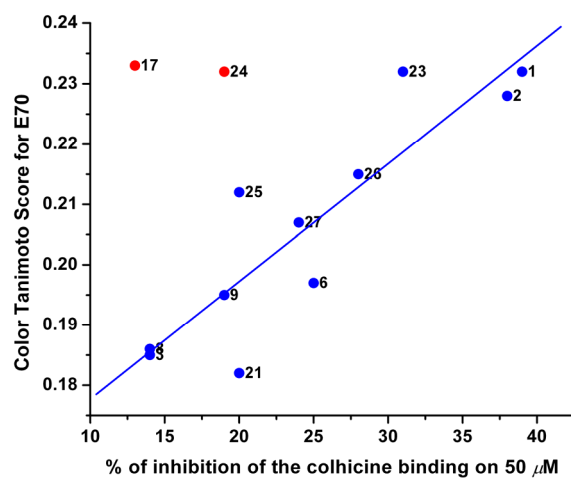

**Figure S8.** Trend between the percentage of inhibition of colchicine binding at 50  $\mu\text{M}$  and the pharmacophoric similarity of compounds with E70.

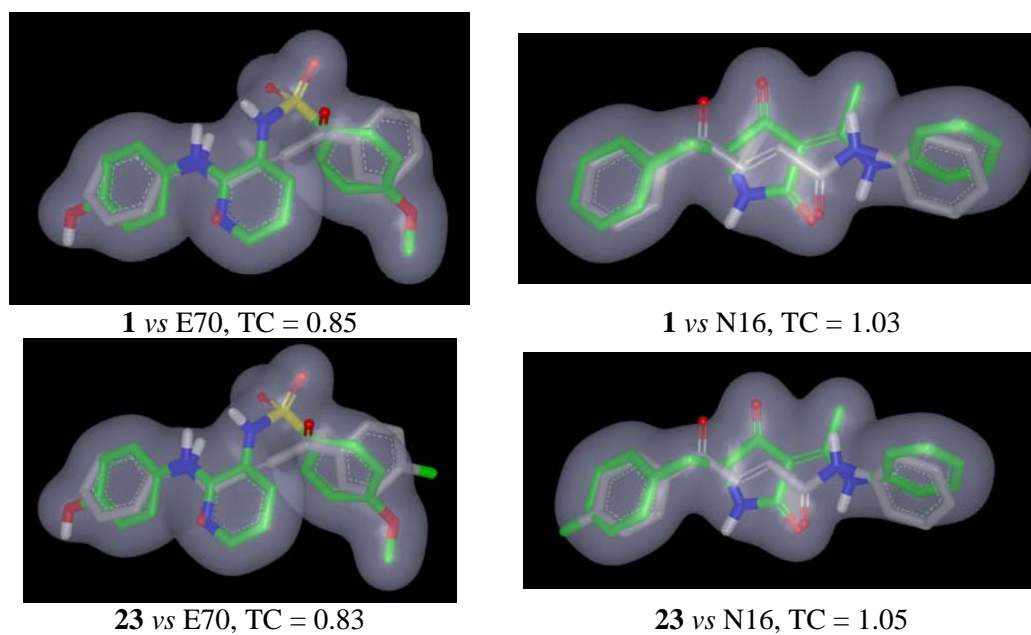

**Figure S9.** Compounds **1** and **23** overlapped on E70 and N16. Similarity obtained by Tanimoto combo (TC) scoring.
